# Supplementary figures and images for: Uberon, an integrative multi-species anatomy ontology
Source: Springer Nature journal article supplement (doi:10.1186/gb-2012-13-1-r5), 2012-01-31

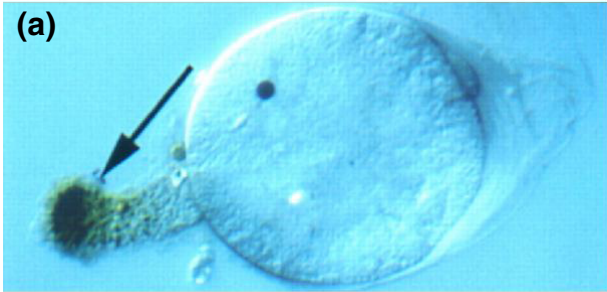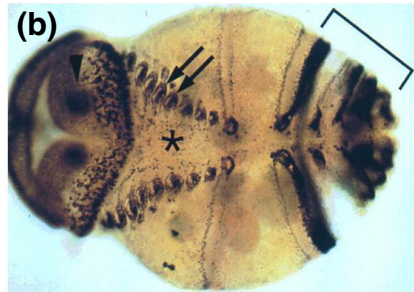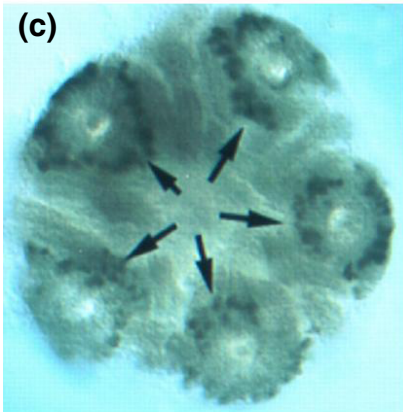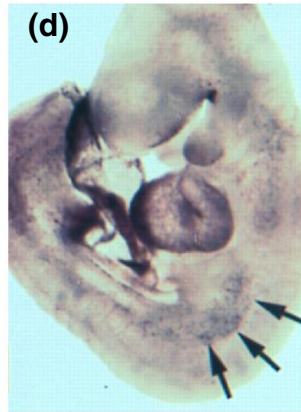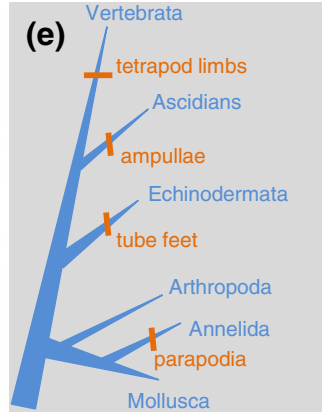

Supplement: 13059_2011_2753_MOESM10_ESM.pdf [file 13059_2011_2753_MOESM10_ESM.pdf]

- ← is\_a(SubClassOf)
- ← part\_of
- ← develops\_from
- ← surrounded\_by

## EHDA A2

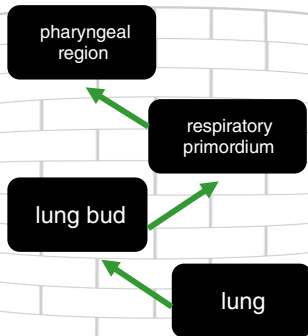

## MPO

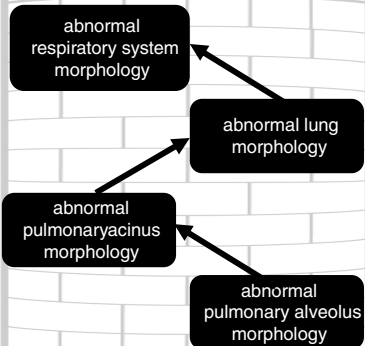

## GO

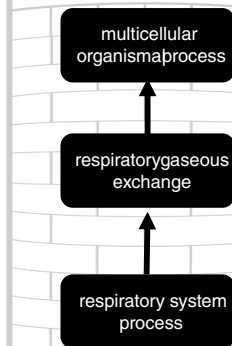

## MA

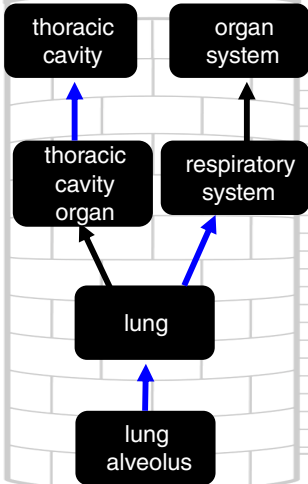

## FMA

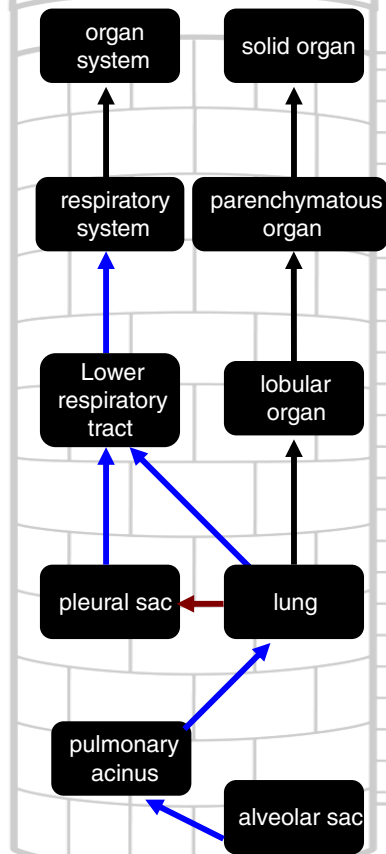

Supplement: 13059_2011_2753_MOESM6_ESM.pdf [file 13059_2011_2753_MOESM6_ESM.pdf]

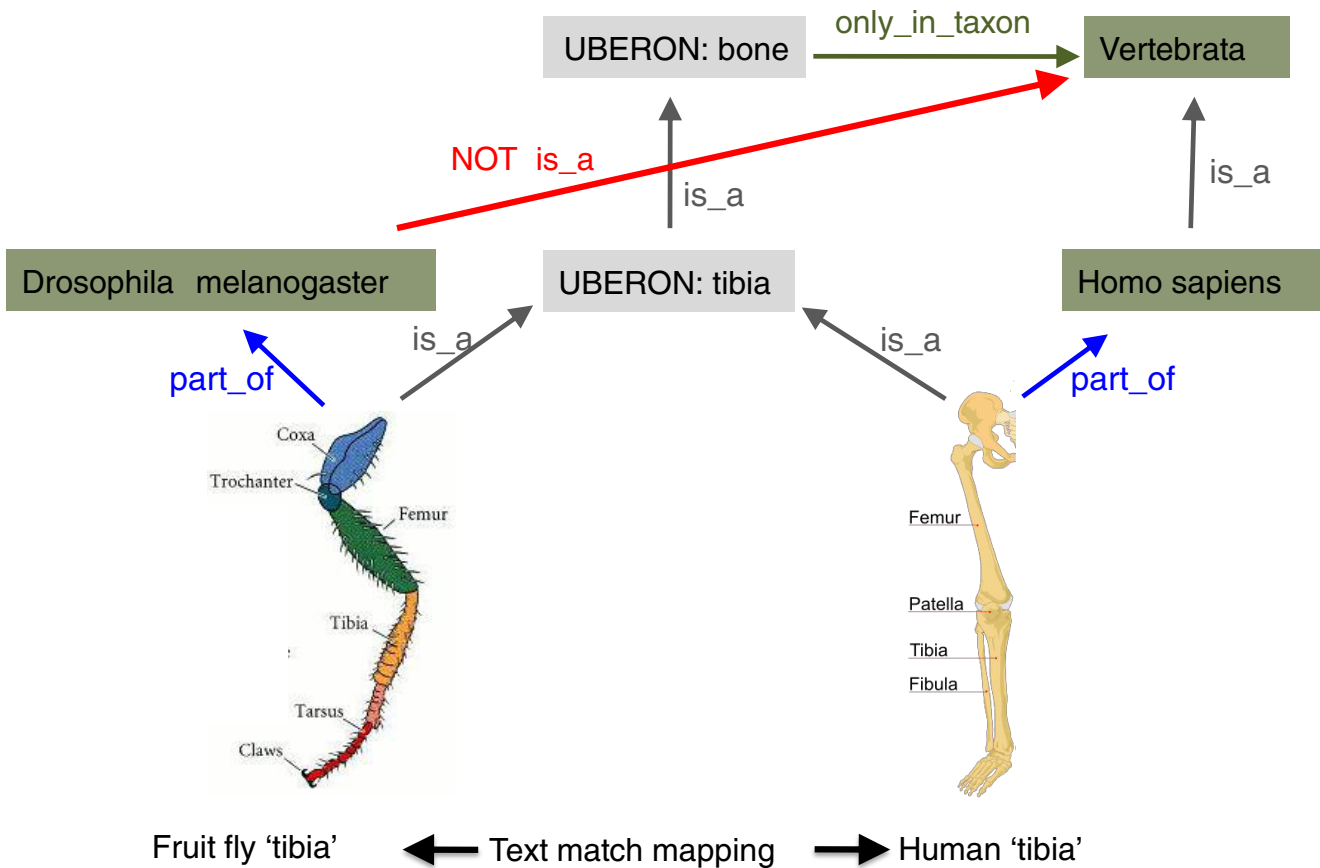

Supplement: 13059_2011_2753_MOESM9_ESM.pdf [file 13059_2011_2753_MOESM9_ESM.pdf]
